# Supplementary material for: A Delphi Study Investigating Clinicians’ Views on Access to, Delivery of, and Adaptations of MBCT in the UK Clinical Settings
Source: Springer Nature journal article supplement (doi:10.1007/s12671-021-01706-5), 2021-07-30
Supplement: MOESM1 [file 19407840]

**Supplementary Material**

**S1.**

**PPI: Thoughts from External Clinicians**

***Clinician One, NHS CMHT***

“Immediate thoughts are that people who are passionate about MBCT are quite concerned about the drift away from proper practise to lots of clinicians finding things online and sharing them so would welcome a study like this and the opportunity to have their say. It doesn't seem overly onerous to me in terms of time needed etc.”

***Clinician Two, NHS Psychotherapy service***

**“**This sounds really interesting and well thought out in terms of design. I think stage 2 of the study is definitely feasible for clinicians to complete particularly as the majority of the questionnaire is getting them to rate on a scale so in terms of time demand it doesn’t seem onerous. Also each round is spread out every couple of months which means it isn’t a huge demand on their time in one go.  Your recruitment numbers also seem realistic and I do think it is a good idea to recruit from various sources as I know the provision of MBCT in **** NHS services has been limited.”

**Supplementary Table 1.** Organisations and social media accounts who were contacted for recruiting expert mindfulness-based teachers

| **Recruitment methods** |
| --- |
| Twitter |
| University faculty announcement service |
| Mindfulness-based teachers (google search (local), word of mouth, teachers who the lead researcher knows through networking) |
| Urban mindfulness |
| Mindful mind |
| Mindfulness Scotland |
| Cheshire Mindfulness |
| SMC mindfulness |
| British Mindfulness Institute |
| Exeter, Bangor, and Oxford mindfulness centres |
| Mindfulness association |
| BPS PsyPAG mailing list (postgraduate listing) |
| Linked In posts |
| Breathworks Charity |

*Note.* The above is not a list of who agreed and distributed study information for us. The list includes those who were contacted only.

**Supplementary Material S2**

**Stage One. Consultation with experts in MBCT and MBIs**

**Consultation Interview Guide (Anonymous). Version 1. 08/03/2020**

Thank you for agreeing to take part in this consultation. As discussed, we would like to take an audio recording of this conversation so that we have a record of what was discussed. Is that OK? If so, I will start recording now.

**Demographics**

1. Duration of any personal mindfulness experience (e.g., months, years):
2. Details of where and when you carried out your mindfulness training and/or gained mindfulness-based qualifications:

**Developing the statements**

We are looking to develop a range of statements concerning best practice for Mindfulness-based Cognitive Therapy (MBCT). Based on your experience, we would like to ask you for your thoughts around the following questions in relation to MBCT/MBIs. Based on your thoughts, we would like to generate statements on which we will then ask clinical practitioners to rate their agreement in the next stage of the research. These statements will be broadly around access to, delivery of, and adaptations made to MBCT in clinical settings.

We are aware that your expertise may lie in either MBCT or another type of MBI; this is fine, please answer in line with your own expertise and experience. The below questions are designed as prompts – please feel free to comment on anything else which you feel is particularly relevant.

**Interview prompts.**

1. What do you feel are the core components of a MBCT course/MBI?
   1. For clients. E.g., are there specific clients/populations who you feel may benefit more/less? Are there any client groups or contexts where you do not think it would be appropriate to use MBI/MBCT?
   2. How widely available do you think MBCT should be within current mental health services? Where should this be available as a frontline treatment? Are there any settings where you think MBCT might be less useful? Are there any client groups or contexts where MBCT should always be considered as a first line of intervention?
   3. For teachers/facilitators. E.g., is it necessary for teachers and facilitators to have a regular mindfulness practice? Why? How much training is necessary for teachers/facilitators? Are there any exceptions?
2. From your own experience, what aspects of a MBCT course/MBI are most valuable?
3. From your own experience, are there any particular aspects of a MBCT course/MBI which are not entirely necessary or valuable?
4. Do you think it is acceptable to adapt MBCT/an MBI for a particular group or context? If so, when might this be? How might this look? Why might these adaptations be made? E.g., duration, timings, content, language, client base, What about adaptions in terms of online or remotely delivered interventions (including self-help interventions)?
5. Are there cases or clients for whom MBCT/MBIs are better suited? Are there cases or clients for whom MBCT/MBIs are not well suited?
6. Are you aware of the UK Mindfulness Network Good Practice Guidelines for Mindfulness Teachers? Is there anything you think might be useful to add into these? Is there anything which you think could be taken out of the guidelines?
7. Is there anything we have not talked about that you think would be relevant to consider?

**Supplementary Table 2.** Empirical papers and guidelines informing the stage one literature review

| **Authors** | **Title** |
| --- | --- |
| Crane et al. (2016) | What defines mindfulness-based programs? The warp and the weft |
| Segal et al. (2002) | Mindfulness-based Cognitive Therapy for Depression (Manual) |
| Baer et al. (2019) | Doing no harm in mindfulness-based programs: conceptual issues and empirical findings |
| Van der Velden et al. (2015) | A systematic review of mechanisms of change in mindfulness-based cognitive therapy in the treatment of recurrent major depressive disorder |
| Fjorback et al. (2011) | Mindfulness-based stress reduction and mindfulness-based cognitive therapy: a systematic review of randomized controlled trials |
| Piet & Hougard (2011) | The effect of mindfulness-based cognitive therapy for prevention of relapse in recurrent major depressive disorder: a systematic review and meta-analysis |
| Parsons et al. (2017) | Home practice in mindfulness-based cognitive therapy and mindfulness-based stress reduction: a systematic review and meta-analysis of participants’ mindfulness practice and its association with outcomes |
| Gu et al. (2015) | How do mindfulness-based cognitive therapy and mindfulness-based stress reduction improve mental health and wellbeing? A systematic review and meta-analysis of mediation studies. |
| Wong et al. (2018) | The safety of mindfulness-based interventions: a systematic review of randomized controlled trials. |
| Lovas and Schuman-Olivier (2018). | Mindfulness-based cognitive therapy for bipolar disorder: a systematic review |
| Mackenzie et al. (2018) | Mindfulness-based cognitive therapy in patients with depression: current perspectives |
| Goldberg et al. (2019) | Mindfulness-based cognitive therapy for the treatment of current depressive symptoms: a meta-analysis |
| Strege et al. (2018) | A pilot study of the effects of mindfulness-based cognitive therapy on positive affect and social anxiety symptoms |
| Chadwick (2019) | Mindfulness for psychosis: a humanising therapeutic process |
| Zerubavel & Messman-Moore (2013). | Staying present: Incorporating mindfulness into therapy for dissociation |
| Treleaven (2018) | Trauma-sensitive mindfulness: practices for safe and transformative healing |
| Rycroft-Malone et al., 2017 | Accessibility and implementation in the UK NHS services of an effective depression relapse prevention programme: learning from mindfulness-based cognitive therapy through a mixed-methods study |
| Dimidjian & Segal (2015) | Prospects for a clinical science of mindfulness-based intervention |
| Crane & Kuyken, 2013 | The implementation of MBCT: learning from the UK health service experience |
| Kuyken et al., 2012 | MBCT implementation guidelines |
| Crane, 2016 | Implementing mindfulness in the mainstream |
|  | MBCT-Adherence Scale; Segal et al., 2002 |
|  | MBI-TAC; Crane et al., 2018 |
| Mindfulness network | Good practice guidelines |
| NICE | Guidelines for depression |
| University of Bangor Centre for Mindfulness Research and Practice | MBCT training documents owned by the lead researcher obtained from their mindfulness teacher training retreat level one. |

**Supplementary Material S3. Statements**

**Supplementary Table 3.** Categories and sub-categories for the statements

| **Category** | **Sub-category** | **Number of statements** |
| --- | --- | --- |
| Access | Preparation to access MBCT | 2 |
|  | Ease of access to MBCT | 5 |
| Delivery | Population | 18 |
|  | Risks | 5 |
|  | Good Practice Guidelines | 2 |
|  | Teacher training & Personal practice | 8 |
|  | Services | 5 |
|  | Resources | 2 |
| Adaptations | Course structure | 6 |
|  | Types | 6 |

**The Statements**

**Access**

**Preparation to access MBCT**

**Q. To what extent do you believe the following statements are important?**

Completely unimportant – Somewhat unimportant – Neither important or unimportant – Somewhat Important – Very important -– Open comments

1. A comprehensive assessment with each client should be carried out prior to starting MBCT (e.g. to discuss expectations, timing/readiness, contraindications)
2. The potential risks and difficulties of MBCT are fully discussed with clients before MBCT starts

**Ease of access to MBCT**

**Q. To what extent do you agree that …**

Strongly disagree – Disagree – Neither agree nor disagree – Agree - Strongly agree – Open comments

1. MBCT should be accessible for all clients who want to take part in it, irrespective of difficulties or service context.
2. MBCT should be more widely available across services
3. MBCT should be accessible across all styles of services (e.g., IAPT, CMHT, EI, inpatient, specialist services etc.)
4. MBCT in its standard format is too much of a commitment (e.g., total course duration, session length, amount of home practice)
5. MBCT carries a stigma; clients and/or services may perceive it as “airy fairy” or lacking credibility

**Delivery**

**Q. To what extent do you agree that MBCT could be considered as an intervention for…**

Strongly disagree – Disagree – Neither agree nor disagree – Agree - Strongly agree – Don’t know - Open comments

1. Anybody who wants to take part in it
2. With careful adaptations, anybody can take part in it
3. Clients who are currently well but who experience recurrent depression
4. Clients experiencing symptoms in line with current depression
5. Clients with current suicidal ideation
6. Clients experiencing multiple comorbid difficulties (e.g., depression, trauma, substance use).
7. Clients experiencing symptoms in line with a bipolar diagnosis
8. Clients experiencing symptoms in line with anxiety
9. Clients experiencing symptoms in line with psychosis
10. Clients experiencing dissociative symptoms/dissociation
11. Clients with histories of trauma
12. MBCT should be adapted to work with people with a history of trauma (e.g., trauma sensitive mindfulness)
13. Clients experiencing symptoms in line with a ‘crisis’ or acute illness
14. Clients with ‘long-term physical health conditions’ (e.g., cancer, chronic pain, diabetes, tinnitus, multiple sclerosis)
15. Clients experiencing symptoms in line with a diagnosis of 'borderline personality disorder'
16. Clients experiencing symptoms in line with an eating disorder
17. Clients who are experiencing a significant life event
18. Clients who have difficulties with alcohol or substance use/dependence

**Risks of MBCT**

**Q. To what extent do you agree that …**

Strongly disagree – Disagree – Neither agree nor disagree – Agree - Strongly agree – Open comments

1. MBCT should be delivered to clients only when there is a sound, underlying theoretical rationale for doing so (e.g., cognitive vulnerability to depression)
2. It is potentially harmful if MBCT courses do not have an underlying evidence-based foundation
3. Negative effects of meditation can occur if the meditation is not guided safely or held wisely by the teacher
4. Negative effects of meditation can occur irrespective of the teacher's delivery and holding of the group
5. The potential risks or side effects of MBCT are often understated

**Good Practice Guidelines (GPG)**

**Q. To what extent do you agree that…?**

Strongly disagree – Disagree – Neither agree nor disagree – Agree - Strongly agree – Open comments

1. The Good Practice Guidelines (GPG) for MBCT teachers should be adhered to when delivering MBCT courses (<https://bamba.org.uk/wp-content/uploads/2019/06/UK-MB-teacher-GPG-2015-final-2.pdf>)
2. It is more important that the teacher has sufficient experience delivering MBCT, than if they are strictly adhering to the GPG guidelines

**Teacher training and personal practice**

**Q. To what extent do you agree that…?**

Strongly disagree – Disagree – Neither agree nor disagree – Agree - Strongly agree – Open comments

1. Before teaching MBCT, teachers should participate in an MBCT or similar mindfulness-based course themselves
2. Staff cannot effectively teach MBCT if they do not have personal experience of mindfulness meditation
3. Teaching MBCT should be based in an experiential understanding whereby teachers are familiar with the language/territory of mindfulness
4. Staff teaching MBCT should have access to initial training courses as part of their job role
5. Staff teaching MBCT should have access to ongoing supervision and training (e.g., workshops, retreats) as part of their job role
6. Without sufficient training in delivering MBCT, harm could be done
7. Mindfulness-informed therapy is more accessible than delivering a full MBCT course
8. MBCT teacher training is not taken as seriously compared to other therapies (e.g., EMDR, CBT)

**Support and understanding within services**

**Q. To what extent do you agree that…?**

Strongly disagree – Disagree – Neither agree nor disagree – Agree - Strongly agree – Open comments

1. MBCT cannot thrive in a service without adequate support from managers/service leads
2. Services who cannot properly fund MBCT should not offer it at all
3. MBCT needs to be properly resourced with sufficient numbers of trained teachers (e.g., to avoid losing the MBCT group if staff leave the service)
4. Staff are teaching MBCT without sufficient training because of service restrictions (e.g., lack of funding)
5. Services need to have a better understanding of MBCT to be able to offer it effectively for clients

**Sufficient resources for delivering MBCT**

**Q. To what extent do you agree that…?**

Strongly disagree – Disagree – Neither agree nor disagree – Agree - Strongly agree – Open comments

1. Sufficient resources to deliver MBCT (e.g., adequate space, mats, handouts, CDs) should be provided by the service
2. The lack of sufficient funding for MBCT puts clients at risk with MBCT being delivered in a non-evidence based manner

**Adaptations**

**Adapting the structure of an MBCT course**

**Q. To what extent do you agree that…?**

Strongly disagree – Disagree – Neither agree nor disagree – Agree - Strongly agree – Open comments

1. It is acceptable to deliver MBCT either in a group or one-to-one format
2. It is acceptable to teach elements of the MBCT curriculum rather than the full MBCT curriculum
3. The MBCT curriculum (e.g., duration, content) can be adapted and tailored to the needs of the group/individual
4. Delivering MBCT as the full 8 week programme is not feasible in clinical settings
5. It is acceptable to shorten individual sessions or the course length to accommodate client needs
6. It is acceptable to shorten individual sessions or the course length to accommodate service needs

**Types of adaptations**

**Q. To what extent do you agree that…?**

Strongly disagree – Disagree – Neither agree nor disagree – Agree - Strongly agree – Open comments

1. Shorter meditation practices during MBCT may help increase participant engagement
2. Practices could be graded by intensity. For example less intense practices could be offered first (e.g., FOFBOC, grounding exercises)
3. There should be fewer home practice requirements
4. Adaptations to MBCT must ensure that they are in line with the underlying evidence base for the population
5. Adaptations should reflect the needs of clients but also be in line with the core philosophy of MBCT
6. If a full MBCT course cannot be delivered, then adaptations should be as close to the original programme as possible

**Supplementary Material S4**

**Supplementary Table 4.** Stage Two recruitment targets

| **Recruitment target** | **Specific details of who to target** |
| --- | --- |
| Special Interest Mindfulness groups | Google search of local and national groups to approach. An example includes, but is not limited to, the Nottingham Mindfulness Group |
| Meditation centres | National meditation centres may include clinical practitioners who are members and/or regularly attend. |
| Mindfulness-based organisations | Including (but not limited to):  University of Bangor (Centre for Mindfulness Research and Practice)  University of Oxford Centre for Mindfulness  University of Exeter mindfulness centre  University of Aberdeen mindfulness centre  Breathworks (Manchester and London)  Integrated Mindfulness (Salford)  British Mindfulness Institute (London)  Sussex Mindfulness  The Mindfulness Project (London) |
| Social media | Examples include: Facebook Clinical Psychology groups including, but not limited to, the UK Clinical Psychology Facebook Group, Clinical Psychologists working in not-for-profit organisations, UK clinical psychologists working with older people, Trainee Clinical Psychologists’ group, Psychologists and Therapists interested in incorporating bodywork in therapy  Facebook counselling psychology groups  Facebook counselling groups including, but not limited to, counselling tutor, Counselling and Psychotherapy Networking, and other relevant groups.  Facebook groups which are open to psychiatrists/junior psychiatrists  Twitter |
| British Psychological Society (BPS) | The BPS is a nationally recognised body for practising Psychologists in the UK. We can approach the BPS to ask if they can promote the study, particularly also amongst their divisions for practising psychologists including, for example, the Division of Clinical Psychology, Division of Counselling Psychology, and the Division of Forensic Psychology. |
| Association for Clinical Psychologists (ACP) UK | The ACP is a nationally recognised body for practising Psychologists in the UK. We can approach the ACP to ask if they can promote the study |
| Clinical Psychology courses | Including 30 UK course centres, to target staff and/or trainees |
| Psychological Professions Network |  |
| University email announcements | University email announcements for research recruitment |
| Private/3rd sector | Including, but not limited to, national charities such as Mind, The Mental Health Foundation, Rethink, Anxiety UK |
| Snowballing | Word of mouth from professionals who agree to take part in this study. Professionals will be asked to share the details of the study with others who they think might also be eligible. |

**Supplementary Material S5**

**Stage Two**

**Supplementary Table 5.** Results for the “don’t know” option across all three rounds

| **Statement** | **Round 1. Number of responses** | **Rationale**  **(if given)** | **Round 2. Number of responses** | **Rationale**  **(if given)** | **Round 3. Number of responses** | **Rationale**  **(if given)** |
| --- | --- | --- | --- | --- | --- | --- |
| Anybody who wants to take part | 2 | Screening is important for expectations and motivation | 2 | No comments | NA | NA |
| With careful adaptations, anybody who wants to take part | 1 | No comments | 1 | No comments | NA | NA |
| Recurrent depression | 0 | NA | NA | NA | NA | NA |
| Depression | 0 | NA | NA | NA | NA | NA |
| Suicidal intent | 0 | NA | 0 | NA | NA | NA |
| Comorbid difficulties | 1 | No comments | 0 | NA | NA | NA |
| Bipolar | 3 | Lack of clinical experience with bipolar | 2 | No comments | 1 | I have no experience working with MBCT and clients in this area |
| Anxiety | 0 | NA | NA | NA | NA | NA |
| Psychosis | 2 | Lack of clinical experience with psychosis | 2 | No comments | 1 | I have no experience working with MBCT and clients in this area |
| Dissociation | 3 | No comments | 0 | NA | NA | NA |
| Trauma | 1 | No comments | NA | NA | NA | NA |
| Trauma sensitive adaptations | 0 | NA | NA | NA | NA | NA |
| In current crisis/acute symptoms | 1 | No comments | 1 | No comments | NA | NA |
| Long term physical health conditions | 0 | NA | NA | NA | NA | NA |
| A diagnosis of borderline personality disorder | 3 | Lack of clinical experience with BPD | 0 | NA | NA | NA |
| Eating disorder | 3 | Not something they know much about | 2 | I have no experience of working with this group using MBCT. Mindfulness however should not be ruled out. | 1 | No comments |
| Significant life events | 0 | NA | 0 | NA | NA | NA |
| Alcohol or substance misuse | 1 | No comments | 1 | No comments | NA | NA |

*Note.* A total of 18 statements for “delivery” of MBCT; NA=not applicable (either because the statement had reached consensus in an earlier round or participants had not rated “don’t know” for this option at that particular round.

**Supplementary Table 6.** Final round (3) scoring for non-consensus statements (percentages for each rating)

| **Statement** | **Strongly disagree** | **Disagree** | **Neither agree nor disagree** | **Agree** | **Strongly agree** | **Don’t know** |
| --- | --- | --- | --- | --- | --- | --- |
| **Access-ease** | | | | | |  |
| MBCT should be accessible for all clients who want to take part in it, irrespective of difficulties or service context. | 0 | 56 | 16 | 20 | 8 | NA |
| MBCT in its standard format is too much of a commitment (e.g., total course duration, session length, amount of home practice) | 12 | 48 | 8 | 32 | 0 | NA |
| MBCT carries a stigma; clients and/or services may perceive it as “airy fairy” or lacking credibility | 8 | 48 | 20 | 24 | 0 | NA |
| **Delivery-population** | | | | | |  |
| Anybody who wants to take part in it | 4 | 48 | 4 | 44 | 0 | 0 |
| Clients experiencing dissociative symptoms/dissociation | 8 | 44 | 32 | 16 | 0 | 0 |
| Clients with current suicidal ideation | 0 | 24 | 12 | 60 | 4 | 0 |
| Clients experiencing symptoms in line with a bipolar diagnosis | 0 | 0 | 32 | 64 | 0 | 4 |
| Clients experiencing symptoms in line with psychosis | 0 | 8 | 36 | 48 | 4 | 4 |
| Clients experiencing symptoms in line with an eating disorder | 0 | 0 | 32 | 64 | 0 | 4 |
| Clients who have difficulties with alcohol or substance use/dependence | 4 | 8 | 40 | 48 | 0 | 0 |
| **Delivery–risks** |  |  |  |  |  |  |
| MBCT should be delivered to clients only when there is a sound, underlying theoretical rationale for doing so (e.g., cognitive vulnerability to depression) | 0 | 48 | 20 | 24 | 8 | NA |
| The potential risks or side effects of MBCT are often understated | 0 | 12 | 28 | 60 | 0 | NA |
| **Delivery–services** |  |  |  |  |  |  |
| Services who cannot properly fund MBCT should not offer it at all | 0 | 20 | 56 | 20 | 4 | NA |
| Staff are teaching MBCT without sufficient training because of service restrictions (e.g., lack of funding) | 0 | 4 | 40 | 48 | 8 | NA |
| **Adaptations-types** |  |  |  |  |  |  |
| Practices could be graded by intensity. For example less intense practices could be offered first (e.g., FOFBOC, grounding exercises) | 0 | 16 | 24 | 48 | 12 | NA |
